# Supplementary material for: Fluorescence fiber-optic turn-on detection of trace hydrazine vapor with dicyanovinyl-functionalized triazatruxene-based hyperbranched conjugated polymer nanoparticles
Source: Royal Society of Chemistry journal article supplement (doi:10.1039/c7py00015d), 2017-01-01
Supplement: c7py00015d1.pdf [file c7py00015d1.pdf]

## Fluorescence fiber-optic turn-on detection of trace hydrazine vapor with dicyanovinyl-functionalized triazatruxene-based hyperbranched conjugated polymer nanoparticles

Yuxiang Xu<sup>a,b</sup>, Hua Li<sup>a,b</sup>, Xiaofu Wu<sup>a</sup>, Yonghong Chen<sup>a,c</sup>, Hao Hang<sup>a,b</sup>, Hui Tong<sup>a\*</sup>, Lixiang Wang<sup>a\*</sup>

<sup>a</sup>State Key Laboratory of Polymer Physics and Chemistry, Changchun Institute of Applied Chemistry, Chinese Academy of Sciences, Changchun 130022, P. R. China.

<sup>b</sup>University of Chinese Academy of Sciences, Beijing 100049, P. R. China.

<sup>c</sup>University of Science and Technology of China, Hefei 230026, P. R. China.

### Supporting Information

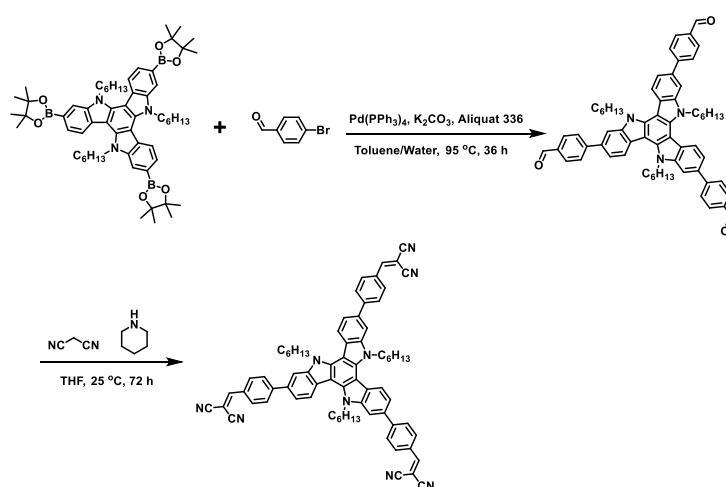

Scheme S1. Synthesis of TAT-DCV.

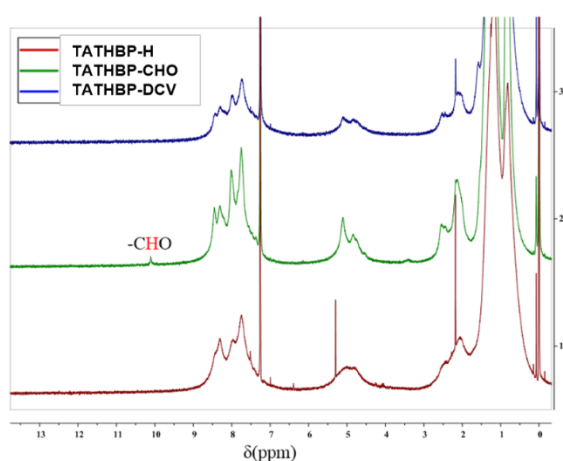

Fig. S1 <sup>1</sup>H NMR spectra of TATHBP-H, TATHBP-CHO and TATHBP-DCV in CDCl<sub>3</sub>.

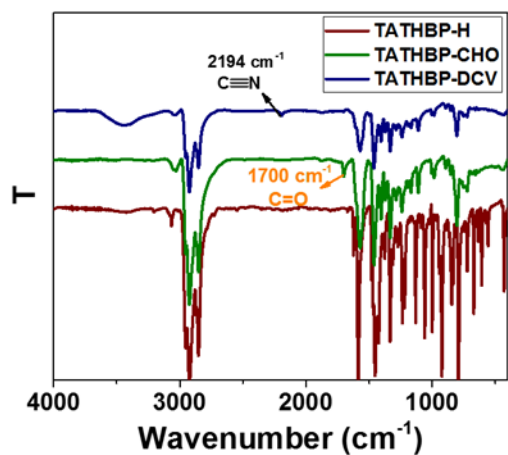

Fig. S2 FT-IR spectra of TATHBP-H, TATHBP-CHO and TATHBP-DCV.

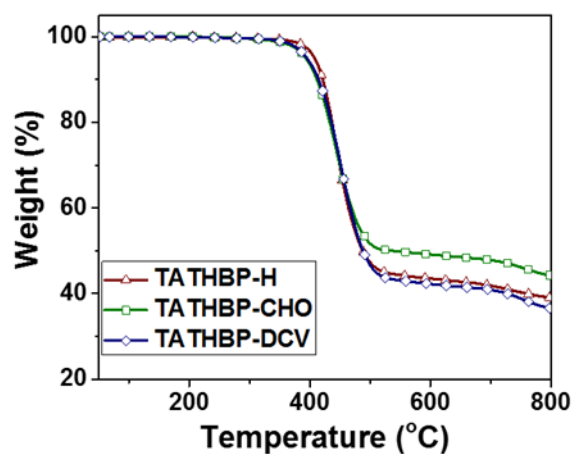

Fig. S3 TGA curves of TATHBP-H, TATHBP-CHO and TATHBP-DCV recorded under  $\text{N}_2$  atmosphere.

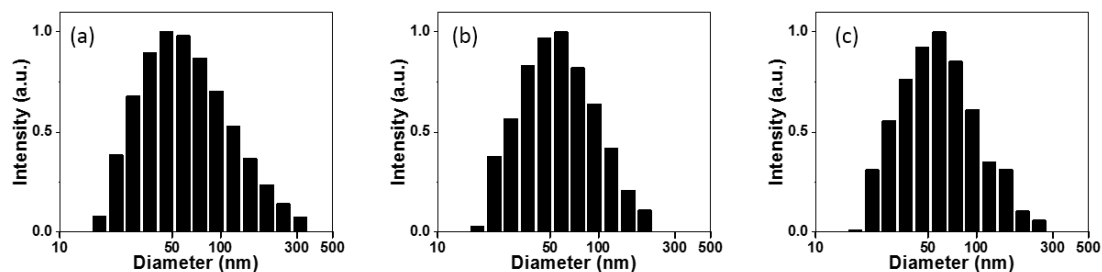

Fig. S4 Hydrodynamic diameters of TATHBP-H (a), TATHBP-CHO (b), and TATHBP-DCV (c) measured by dynamic light scattering.

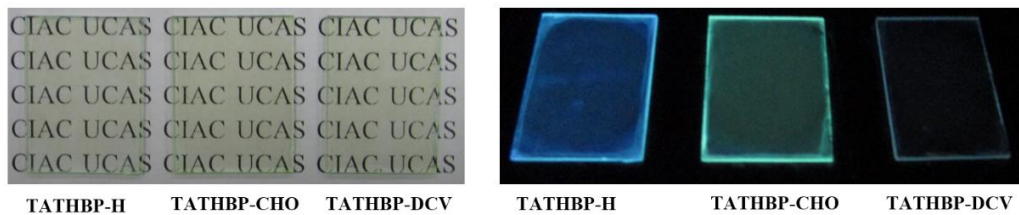

Fig. S5 Images of **TATHBP-H**, **TATHBP-CHO** and **TATHBP-DCV** films coated on glass substrates under sunlight (left) and UV light(right).

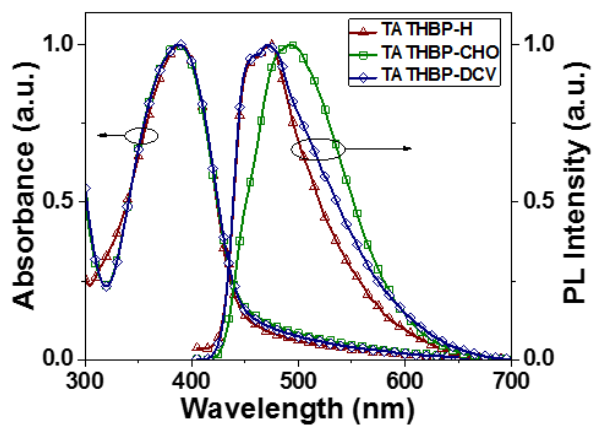

Fig. S6 UV-vis absorption and PL spectra of **TATHBP-H**, **TATHBP-CHO** and **TATHBP-DCV** spin-coated films.

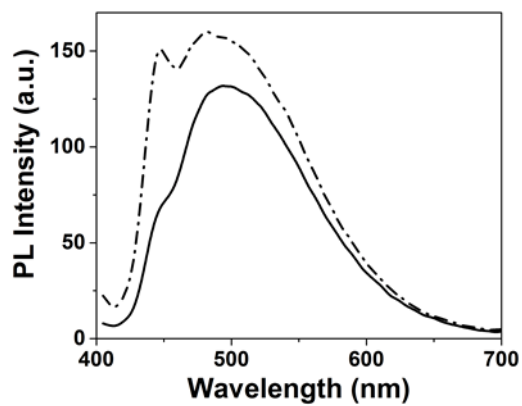

Fig. S7 PL spectra of spin-coated film of **TATHBP-CHO** on glass substrates before (solid) and after exposure to saturated hydrazine vapor for 12 hour (dash-dot).

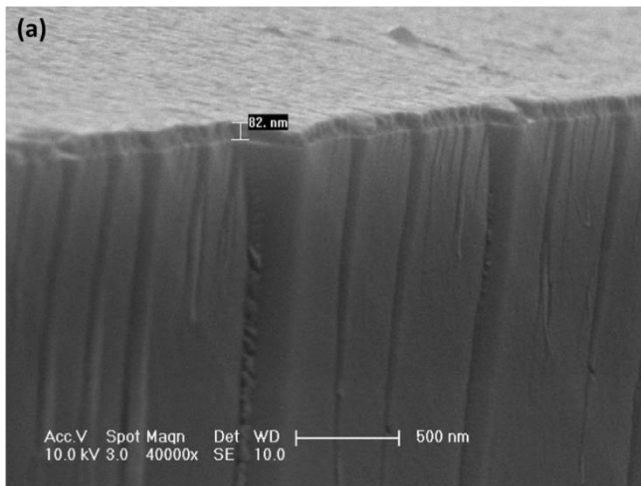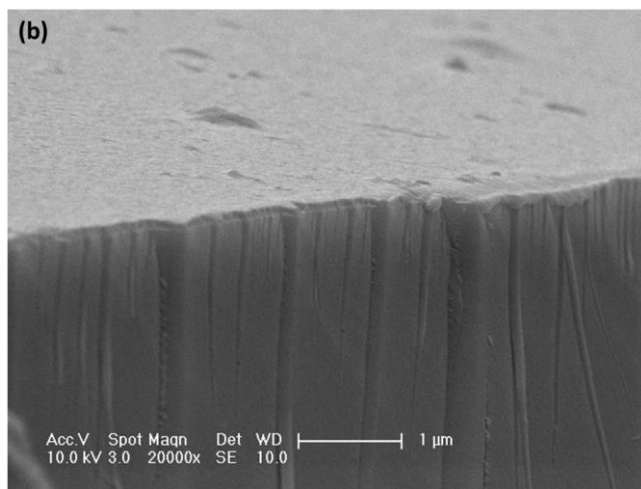

**Fig. S8** Two SEM images of the **TATHBP-DCV** film coated on fiber-optic tip.

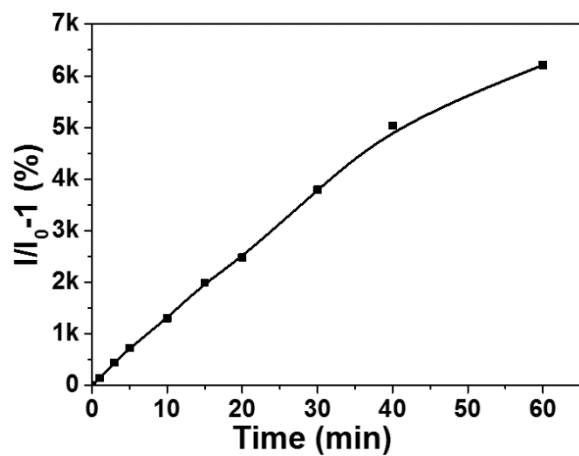

Fig. S9 Time-dependent fluorescence enhancement of TATHBP-DCV film coated on fiber-optic tip upon exposure to hydrazine vapor.

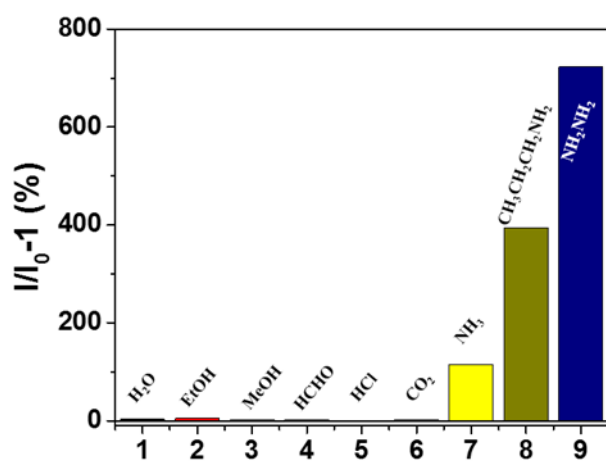

Fig. S10 Fluorescent enhancement of TATHBP-DCV coated fiber-optic tips upon exposure to hydrazine and other common interference vapors for 5 min.

**Table S1** A list of recently reported fluorescence sensors for detection of hydrazine vapor.

| Publication                                           | Probe's chemical structure                                                          | Limit of Detection                            | Detection method                                                                                           |
|-------------------------------------------------------|-------------------------------------------------------------------------------------|-----------------------------------------------|------------------------------------------------------------------------------------------------------------|
| <i>This work</i>                                      | 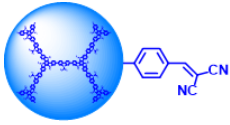   | 1.1 mg/m <sup>3</sup><br>0.01% solution (aq.) | Optic-fiber for 5 min based on fluorescence turn on detection                                              |
| <i>Adv. Mater.</i> <b>2006</b> ,<br>18, 1047-1050     |    | 100 ppb                                       | Fido sensing platform based on fluorescence enhancement                                                    |
| <i>Chem. Sci.</i> , <b>2013</b> ,<br>4, 4121-4126     |    | n.d.                                          | TLC plates for 1.0 min based on fluorescence turn on detection at hydrazine vapor (9.0 mmHg)               |
| <i>RSC Adv.</i> <b>2013</b> , 3,<br>17924-17929       |  | n.d.                                          | silica plates for a few minutes based on ratiometric fluorescence detection at hydrazine vapor (14.4 mmHg) |
| <i>Anal. Chem.</i> <b>2014</b> ,<br>86, 4611-461      |  | 5.4 mg/m <sup>3</sup><br>0.05% solution (aq.) | TLC plates for 10 min based on ratiometric fluorescence detection                                          |
| <i>Anal. Methods</i> ,<br><b>2014</b> , 6, 4705-4709  |  | 0.4% solution (aq.)                           | Nylon 66 microporous membranes for 10 min based on fluorescence "switch-on" approach                       |
| <i>Anal. Chem.</i> <b>2015</b> ,<br>87, 9101-9107     |  | 0.1% solution (aq.)                           | filter papers for 15 min based on Near-Infrared fluorescence turn on detection                             |
| <i>Chem. Commun.</i> ,<br><b>2014</b> , 50, 1485-1487 |  | 111.7 mg m <sup>-3</sup><br>1% solution (aq.) | TLC plates for 10 min based on fluorescence turn on detection at hydrazine vapor                           |

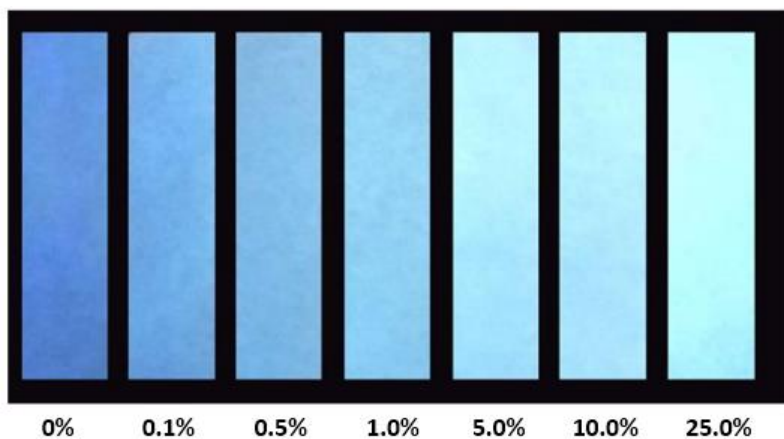

**Fig. S11** Fluorescent images of TATHBP-DCV-coated filter papers after exposure to hydrazine vapor from aqueous hydrazine solutions with different hydrazine concentrations.

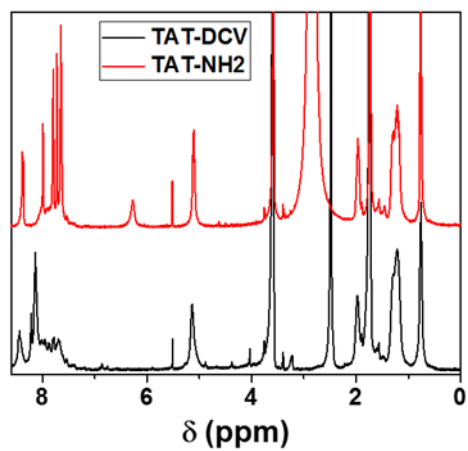

**Fig. S12** <sup>1</sup>H NMR spectra of TAT-DCV and TAT-NH<sub>2</sub> in THF-d<sub>8</sub>.

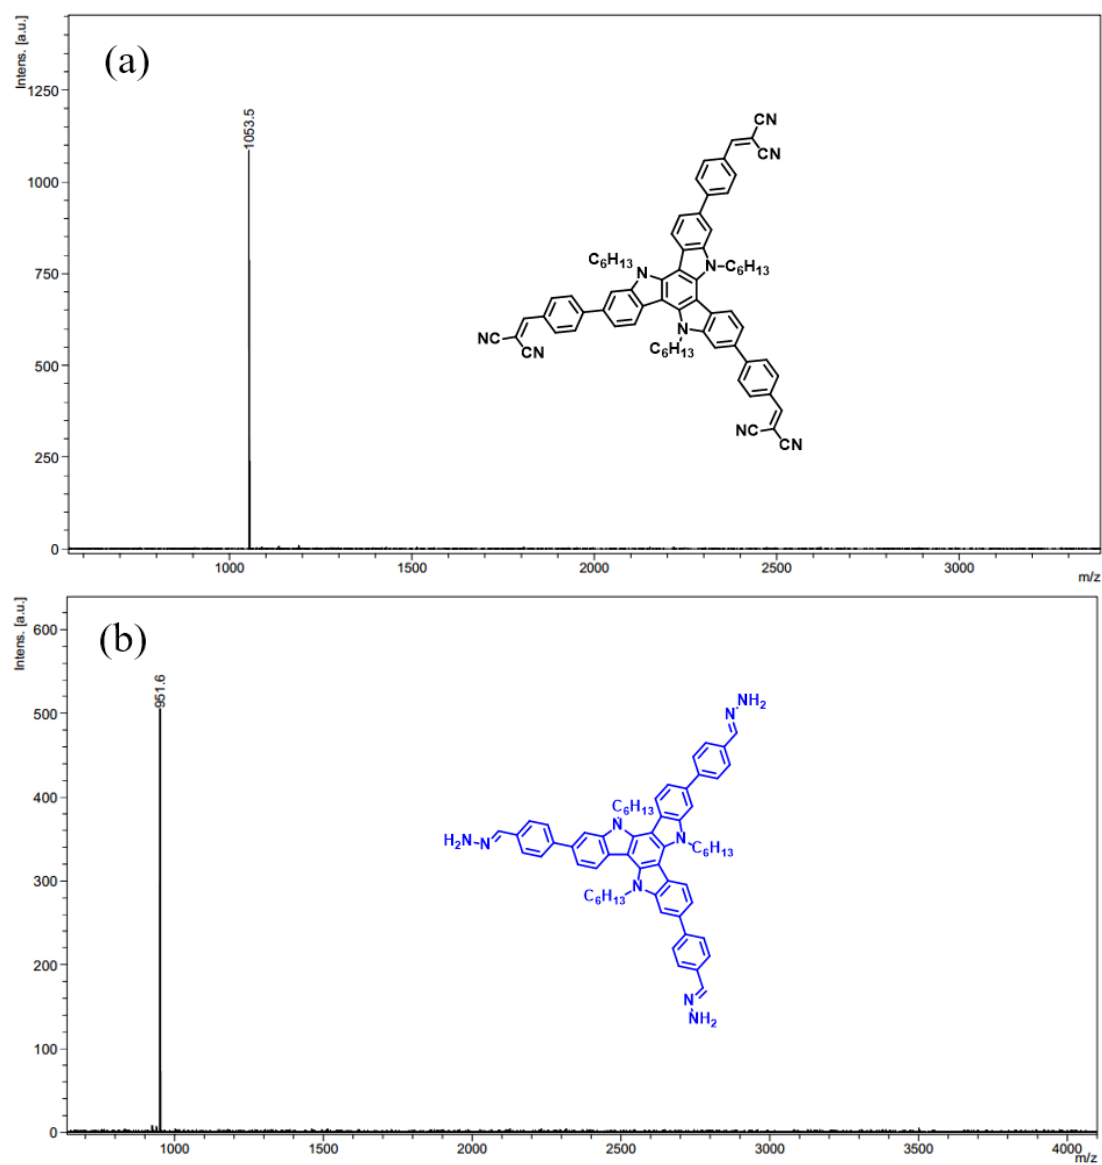

**Fig. S13** MALDI-TOF MS spectra of **TAT-DCV** (a) and **TAT-NH2** (b).

MALDI-TOF MS (m/z) of **TAT-DCV**: Calcd. for  $C_{72}H_{63}N_9$ ,  $[M]^+$ : 1053.5; Found: 1053.5.

MALDI-TOF MS (m/z) of **TAT-NH2**: Calcd. for  $C_{63}H_{69}N_9$ ,  $[M]^+$ : 951.6; Found: 951.6.



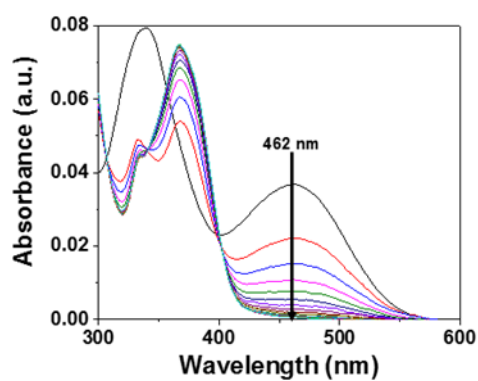

Fig. S14 Absorption spectral changes of TAT-DCV solution after addition of hydrazine hydrate.

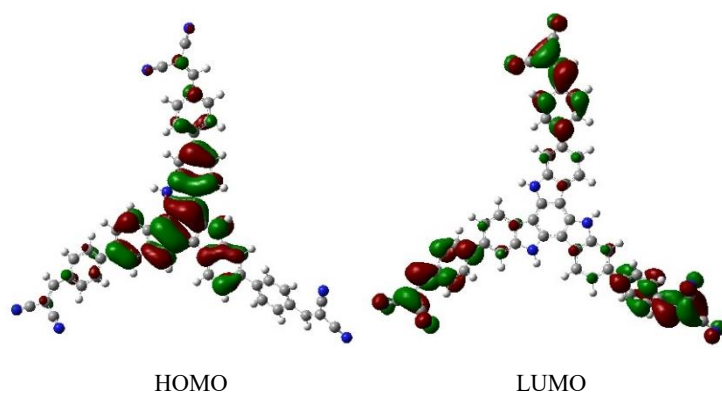

Fig. S15 HOMO and LUMO of TAT-DCV calculated at the B3LYP/6-31G (d) level.

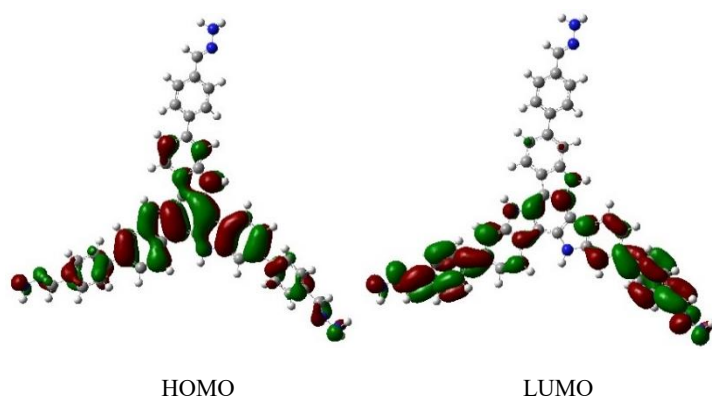

Fig. S16 HOMO and LUMO of TAT-NH<sub>2</sub> calculated at the B3LYP/6-31G (d) level.

Molecular geometries of two model compounds for TAT-DCV and TAT-NH<sub>2</sub> were optimized using density functional theory at the B3LYP/6-31G(d) level. To simplify the calculation, the alkyl groups on the triazatruxene units are replaced by hydrogen atoms. Frequency calculations were performed at the B3LYP/6-31G(d) level. The isodensity coefficient used to illustrate the HOMO/LUMO is 0.02. All calculations were carried out using the Gaussian 03 suite of programs.

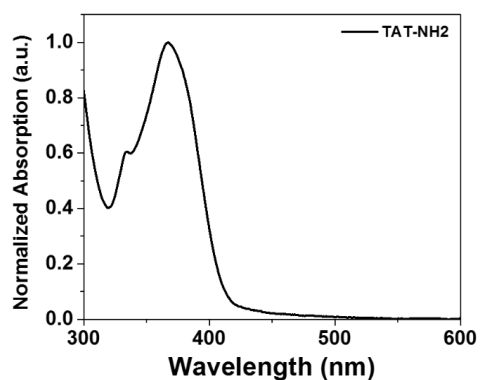

Fig. S17 UV-Vis Absorption spectrum of TAT-NH2 in THF.

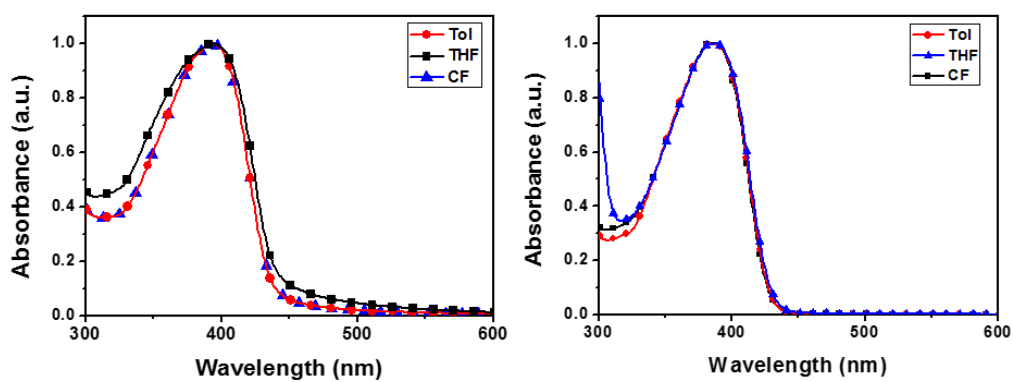

Fig. S18 Absorption spectra of TATHBP-CHO (a) and TATHBP-DCV (b) in varying solvents.

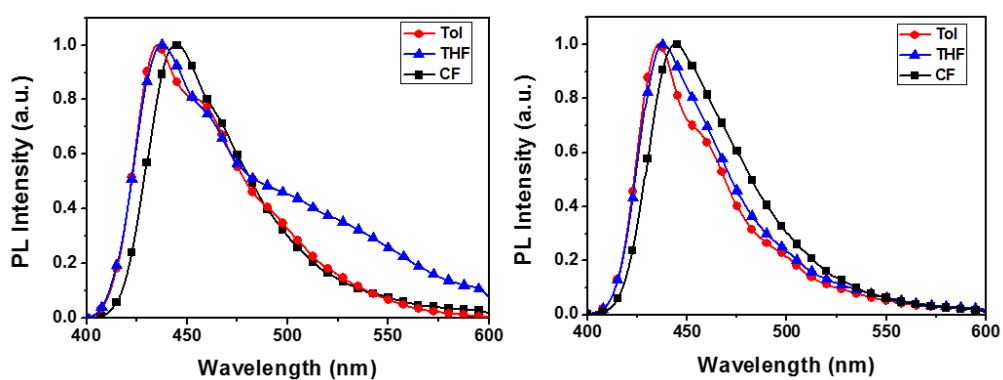

Fig. S19 Emission spectra of TATHBP-CHO (a) and TATHBP-DCV (b) in varying solvents.
